# Supplementary material for: Association between maternal education and malocclusion in Mongolian adolescents: a cross-sectional study
Source: PubMed Central journal article supplement — BMJ Open. 2016 Nov 1;6(11):e012283. doi: 10.1136/bmjopen-2016-012283 (PMC5129091; doi:10.1136/bmjopen-2016-012283), 2016-11-01
Supplement: bmjopen-2016-012283supp-file.pdf [file bmjopen-2016-012283supp-file.pdf]

## Supplemental file

| Occlusal triats            | $\kappa$ value (agreement in %) | Strength of agreement |
|----------------------------|---------------------------------|-----------------------|
| Anterior Crossbite         | 1.00 (100%)                     | Perfect               |
| Posterior Crossbite        | 1.00 (100%)                     | Perfect               |
| Scissors bite              | 0.47 (92.3%)                    | Moderate              |
| Overjet                    | 0.85 (98.2%)                    | Perfect               |
| Reverse Overjet            | 1.00 (100%)                     | Perfect               |
| Overbite                   | 0.23 (94.6)                     | Fair                  |
| Displacement in Upper arch | 0.74 (96.4%)                    | Substantial           |
| Displacement in Lower arch | 0.23 (94.6%)                    | Fair                  |
| CLP                        | 1.00 (100%)                     | Perfect               |
| Impeded Eruption           | 0.14 (91.1%)                    | Slight                |
| Hypodontia                 | 0.61 (92.8%)                    | Substantial           |
| Openbite                   | 1.00 (100%)                     | Perfect               |
| Overall                    | 0.68 (96.7%)                    | Substantial           |
